# Supplementary material for: Rate-independent hysteretic energy dissipation in collagen fibrils
Source: Royal Society of Chemistry journal article supplement (doi:10.1039/d3sm01625k), 2024-01-01
Supplement: d3sm01625k1.pdf [file d3sm01625k1.pdf]

## ELECTRONIC SUPPLEMENTARY INFORMATION

### Rate-independent hysteretic energy dissipation in collagen fibrils

Robert Magerle, Paul Zech, Martin Dehnert, Alexandra Bendixen, and Andreas Otto  
*Fakultät für Naturwissenschaften, Technische Universität Chemnitz, 09107 Chemnitz, Germany.*

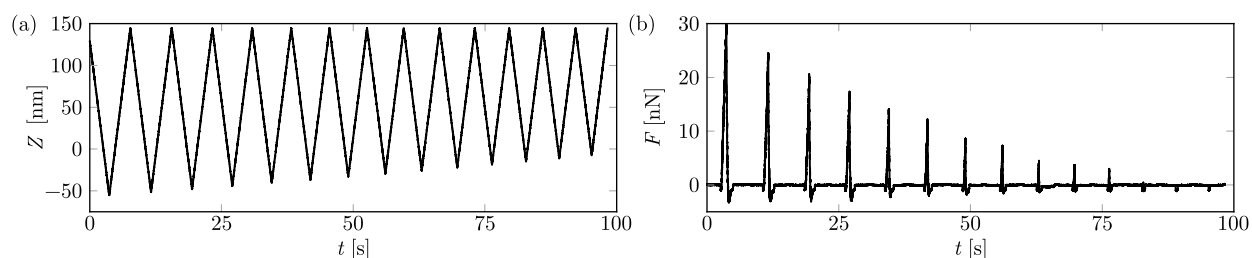

FIG. S1. Experimental protocol for measuring a force trajectory with multiple approach-retract cycles. (a) Piezo displacement  $Z$  and (b) measured force  $F$  as a function of time  $t$ . The data shown are measured on a hydrated collagen fibril at 90% RH using  $v_{\text{tip}} = 0.05 \mu\text{m/s}$ .

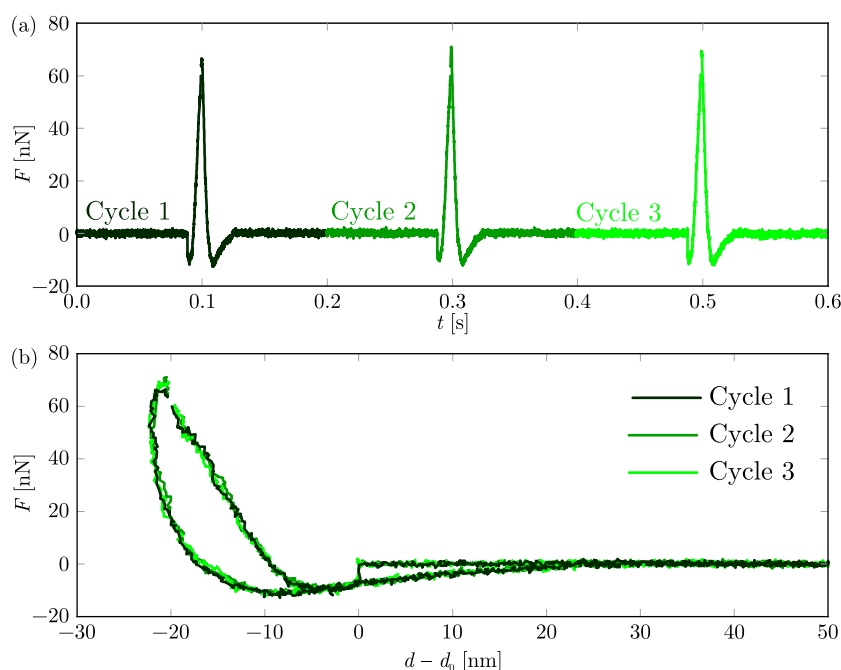

FIG. S2. (a) Force trajectory with three approach-retract cycles measured on a hydrated collagen fibril using  $v_{\text{tip}} = 2 \mu\text{m/s}$ , the same approach setpoint, and a type I AFM tip. (b) The perfect overlap of the corresponding FD cycles demonstrates the steady-state hysteresis and the surface leveling after tip retraction beyond  $d_{\text{off}}$ . The  $d_0$  position was determined from the first FD cycle. Note that due to the large opening angle of the Type I AFM tip, the maximal indentation is smaller than with Type II AFM tips.

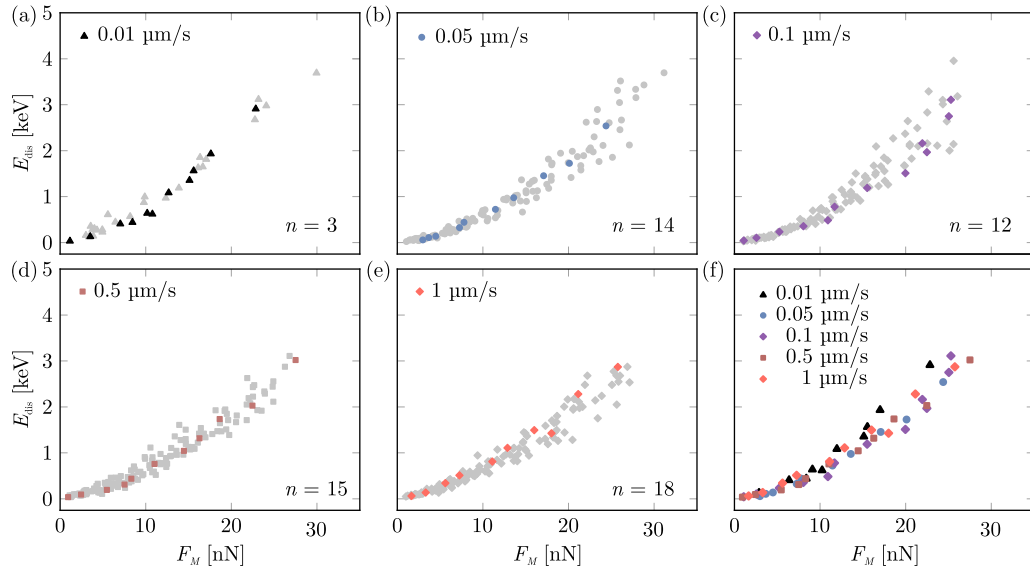

FIG. S3. (a–e)  $E_{\text{dis}}$  as a function of  $F_M$  measured with different  $v_{\text{tip}}$  in cyclic indentation experiments at  $n$  individual positions on the overlap region of the collagen fibril. Colored points are data sets shown in Fig. 2b, which is reproduced in panel (f).
